# Supplementary material
Source: Research Square preprint supplement (doi:10.21203/rs.3.rs-9402363/v1)
Supplement: Supplementary file 1 [file fe406513a45fe700ce6c4898.docx]

**Appendix A**

**1. ESs assessment based on InVEST model**

**1.1 Water Yield**

This module estimates water supply capacity for different land-use types by simulating runoff and evapotranspiration using climatic data, soil properties, and LULC characteristics. For this module, annual precipitation data were derived from records for 2000, 2010, and 2020. Potential evapotranspiration data were obtained from the China 1 km resolution monthly potential evapotranspiration dataset provided by the National Tibetan Plateau Data Center. Through multiple simulations, the model achieved optimal accuracy when the seasonal rainfall factor Z was set to 1.5. The calculation formula is as follows:

Here, *Y*xj denotes the annual water yield (mm) for grid cell *x* of LULC type *j*. *AET*xj represents the annual actual evapotranspiration (mm) for the same cell and LULC type, and *P*x is the annual precipitation (mm) for grid cell *x*.

**1.2 Carbon Storage and Sequestration**

The carbon storage module of the InVEST model was used to estimate carbon stocks based on four carbon pools: aboveground biomass, belowground biomass, soil organic matter, and dead organic matter. The sum of these four carbon pools within the study area represents the total carbon mass stored at a given point in time. Based on relevant studies, the average carbon density for each land use type was set as follows:

Here, *C*total represents the total carbon stock (t·hm⁻²), *C*above is the aboveground carbon stock (t·hm⁻²); *C*below denotes the belowground carbon stock (t·hm⁻²), *C*soil represents the soil carbon stock (t·hm⁻²); and *C*dead is the dead organic carbon stock (t·hm⁻²).

**1.3 Sediment Delivery Ratio**

The sediment delivery ratio was calculated using the Revised Universal Soil Loss Equation (RUSLE), as follows:

In these equations, *RKLS* represents potential soil erosion, *RUSLE* denotes actual soil erosion, and *SC* indicates actual soil retention (t·hm⁻²·a⁻¹). The factors are defined as follows: *R* is the rainfall erosivity factor; *K* represents the soil erodibility factor; *LS* is the slope length and steepness factor (where *L* is slope length and *S* is slope gradient); *C* donates the cover and management factor; and *P*, the support practice factor.

**1.4 Habitat Quality**

The Habitat Quality module quantifies the health status and threat levels of biological habitats across different land-use scenarios, facilitating the identification of ecologically valuable areas and the assessment of their changes over time. In this study, cropland, construction land, and unutilized land were designated as stressors, as these land use types are typically associated with intensive human activity and pose potential threats to natural habitats. In this study, cropland, construction land, and unutilized land were designated as stressors, as these land use types are typically associated with intensive human activity and pose potential threats to natural habitats. Forests, grasslands, and water bodies were defined as habitat types due to their high ecological service value in supporting biodiversity, conserving water resources, and sequestering carbon. In the InVEST model, habitat quality is calculated as follows:

Here, *H*j is denotes the habitat suitability of land use type *j*; *D*2xj represents the total threat level for grid cell *x* within land use type *j*; and *k* is the semi-saturation constant.

By integrating the four modules described above, we established a three-dimensional dataset characterizing the “supply intensity—spatial distribution—stress response” of ESs in Tianjin. This technical approach provides quantitative support for the subsequent zoning management of ecological restoration, enabling priority classification, conflict identification, and benefit assessment. This approach aligns with the framework linking ecosystem service assessment to management proposed and reflects the concept of “dynamic assessment supporting precise management” emphasized. The model outputs were generated at a 1 km × 1 km grid resolution to ensure consistency with the spatial unit scale of Tianjin's territorial planning framework.

**2. Driving factors processing methods in PLUS model**

All driving factors used in this study were uniformly projected to the WGS 1984 coordinate system using ArcGIS and resampled to a 90 m × 90 m spatial resolution. All raster datasets were then masked to the administrative boundary of Tianjin. For the natural factors, elevation data at 90 m resolution were obtained from the Geospatial Data Cloud, and slope data were derived from this elevation dataset using ArcGIS. Following the dual evaluation guidelines for national spatial planning, four driving factors were selected to represent key environmental resources: average annual precipitation, annual mean temperature, normalized difference vegetation index (NDVI), and soil type. Precipitation and temperature data were acquired from the National Meteorological Science Data Center and processed through band integration in ArcGIS. Soil data were obtained from the Resource and Environment Science and Data Center. Vegetation index (NDVI) data were processed in ArcGIS through cropping and resampling to derive the required indicator values. Natural factors, including distance to rivers, were also considered. This was calculated by extracting river basins within the study area using national-level river basin classifications, then applying Euclidean distance analysis. Social factors included accessibility indicators and economic-related data. Accessibility was represented by distances to railways and to expressways, national highways, and provincial highways within the study area. Road network data at all levels were primarily obtained from web map sources. First, road networks at all levels within the study area were extracted. Accessibility analysis was then performed on these road data using the Euclidean distance tool in ArcGIS to generate distance raster layers. Economic-related variables included population density, gross domestic product (GDP), and nighttime light index data. Given the spatial similarities between GDP and nighttime light data, incorporating both helped ensure data accuracy and minimize potential errors. All three datasets—population density, nighttime light, and GDP—were originally at 1 km resolution and were resampled to 90 m resolution for consistency with other layers.
